# Supplementary material for: Identification of Gallbladder‐Specific Distal Regulatory Sequence of Murine Sox17
Source: PubMed Central journal article supplement (PMC11671671; doi:10.1111/gtc.13186), 2024-12-26

# Supplementary Fig.3

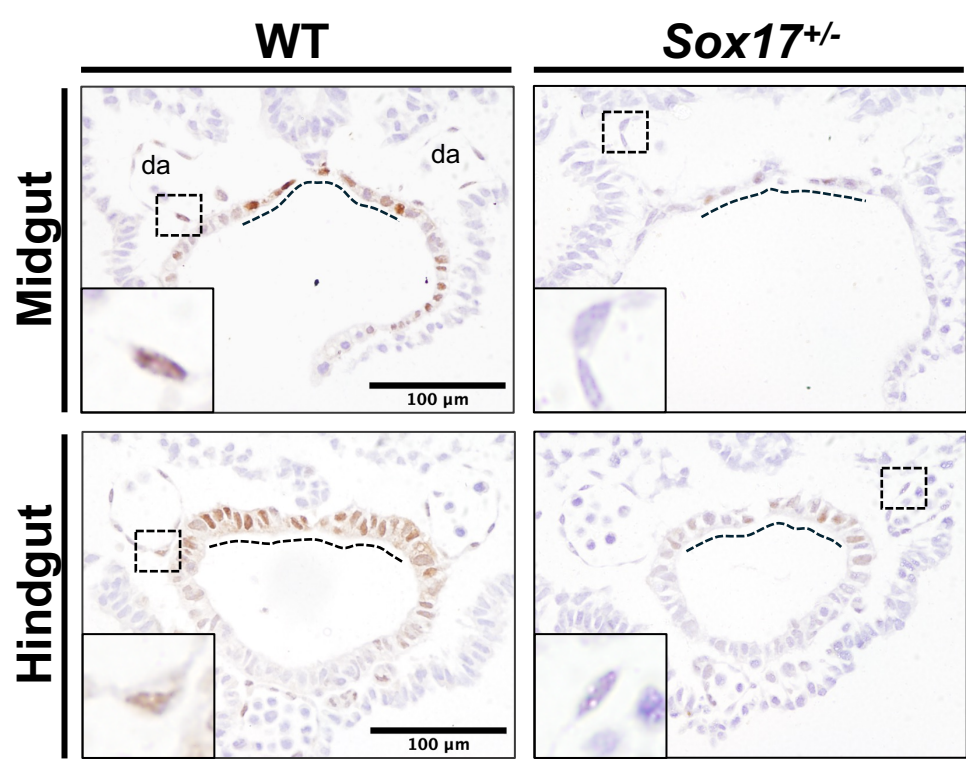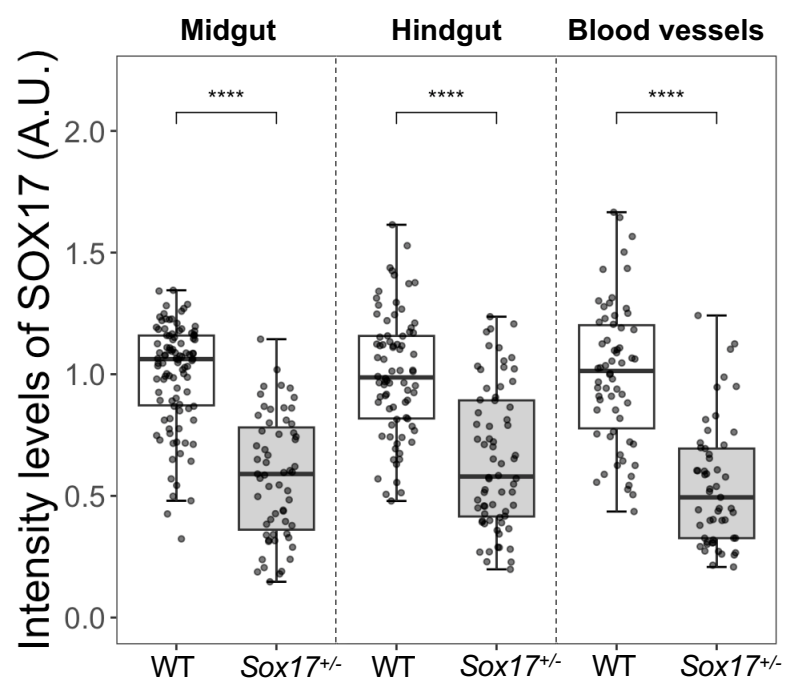

Supplement: GTC-30-0-s003.pdf [file GTC-30-0-s003.pdf]
